# Supplementary material for: A fixed-point algorithm for estimating amplification efficiency from a polymerase chain reaction dilution series
Source: Springer Nature journal article supplement (doi:10.1186/s12859-014-0372-4), 2014-12-01
Supplement: 12859_2014_372_MOESM1_ESM.pdf [file 12859_2014_372_MOESM1_ESM.pdf]

**Table S1 Details of Incubates Flind1 to Flind10. PBL - peripheral blood lymphocytes. HT29 - a cell line derived from colon malignancy.**

| File    | DNA     | Tissue | Amplicon     | Primers<br>(forward above reverse)                   |
|---------|---------|--------|--------------|------------------------------------------------------|
| Flind1  | genomic | PBL    | GADD153      | CTGCACCAAGCATGAACAAT<br>GGGATTGAGGGTCACATCAT         |
| Flind2  | genomic | PBL    | Cox-1        | CACATGACTACATCAGCTGGGAGT<br>GTGGGGCAATCTTTAGGCACAGAG |
| Flind3  | genomic | PBL    | h beta-actin | TTGCCGACAGGATGCAGAAG<br>GCCGATCCACACGGAGTACT         |
| Flind4  | genomic | PBL    | h beta-actin | TTGCCGACAGGATGCAGAAG<br>GCCGATCCACACGGAGTACT         |
| Flind5  | genomic | PBL    | UGT-2B4      | TTACGTCTGAGGCTGGAAGC<br>TGTTTTGTCACAAGAAGAAAGGA      |
| Flind6  | genomic | PBL    | p52          | CTGACTCAGACTGACATTCTCCAC<br>TTCTGACGCACACCTATTGCAAGC |
| Flind7  | comp    | HT29   | c-myc        | CCTCACAACCTTGGCTGAGT<br>GTTCTTTTATGCCCAAAGTCCA       |
| Flind8  | comp    | HT29   | c-myc        | CCTCACAACCTTGGCTGAGT<br>GTTCTTTTATGCCCAAAGTCCA       |
| Flind9  | comp    | HT29   | GADPH        | TGCACCACCAACTGCTTAGC<br>GGCATGGACTGTGGTCATGAG        |
| Flind10 | genomic | PBL    | Cox-1        | CACATGACTACATCAGCTGGGAGT<br>GTGGGGCAATCTTTAGGCACAGAG |
