# Supplementary material for: A fixed-point algorithm for estimating amplification efficiency from a polymerase chain reaction dilution series
Source: Springer Nature journal article supplement (doi:10.1186/s12859-014-0372-4), 2014-12-01
Supplement: 12859_2014_372_MOESM11_ESM.pdf [file 12859_2014_372_MOESM11_ESM.pdf]

Output value of E derived from regression

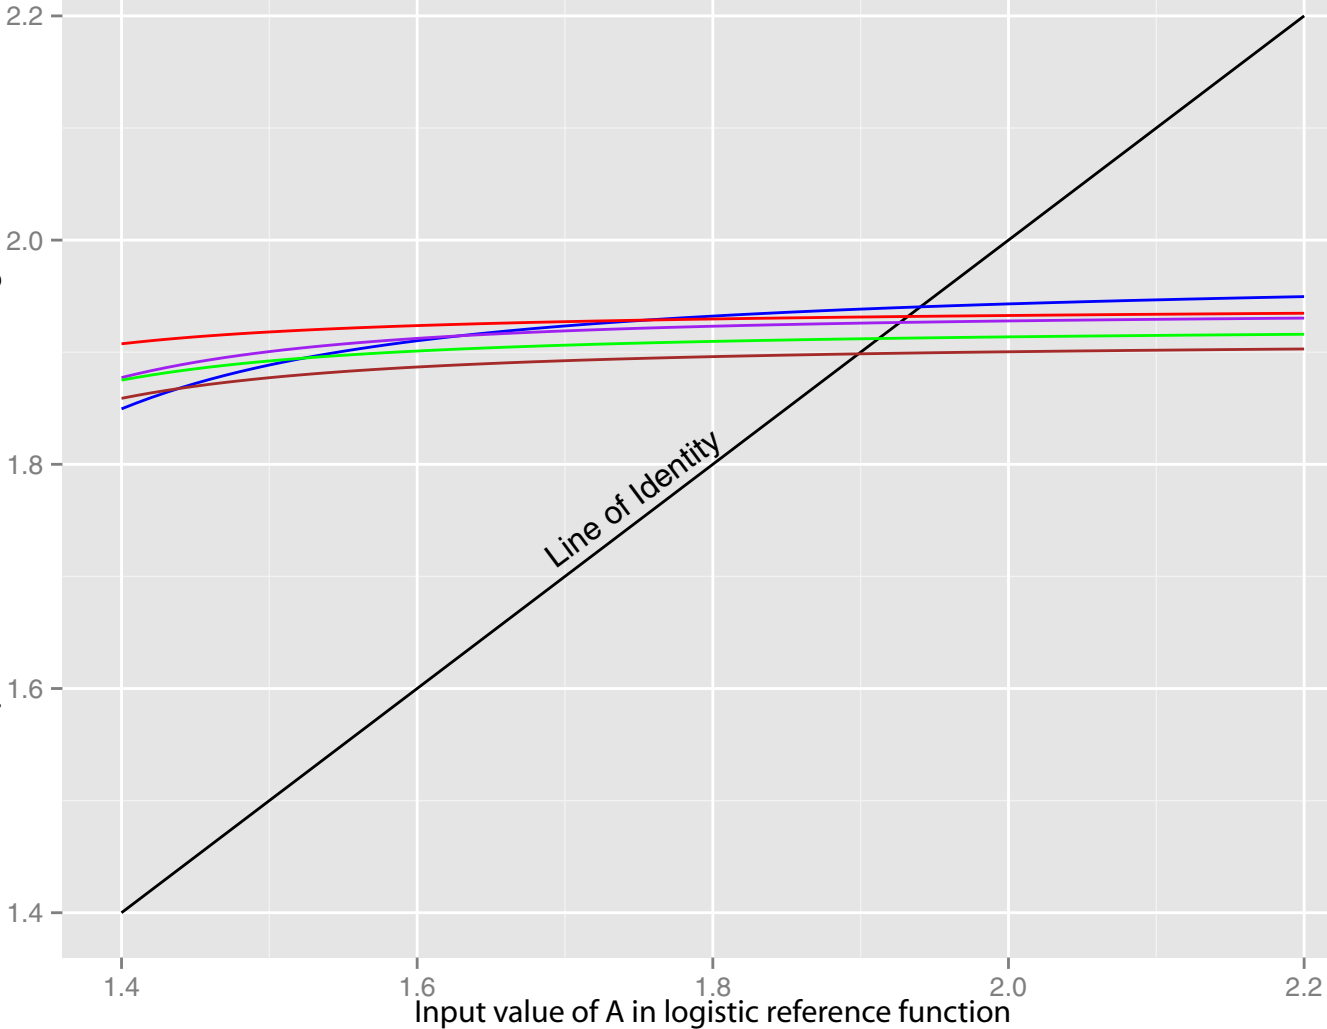

Line of Identity

1.4

1.6

1.8

2.0

2.2

Input value of A in logistic reference function
